# Supplementary material for: A combined association of serum uric acid, alanine aminotransferase and waist circumference with non-alcoholic fatty liver disease: a community-based study
Source: PeerJ journal article supplement (doi:10.7717/peerj.13022), 2022-03-04
Supplement: English_translation_of_questionnaire.pdf [file English_translation_of_questionnaire.pdf]

1...white wine    2...beer    3...red wine    4...wine    5...imported wine  
 6...other (Please indicate on the line: \_\_\_\_\_)

**Personal and family history of diseases**

*Put the corresponding number in the cell according to your situation*

| Diseases         | Have you ever been diagnosed with the disease?<br>0...no 1...yes<br>9...forget | Diagnosis year | Have your immediate family ever been diagnosed with the disease?<br>0...no 1...yes 9...unclear | Relationship with you:<br>1...father 2...mother<br>3...sister or brother<br>4...child |
|------------------|--------------------------------------------------------------------------------|----------------|------------------------------------------------------------------------------------------------|---------------------------------------------------------------------------------------|
| Hypertension     |                                                                                |                |                                                                                                |                                                                                       |
| Diabetes         |                                                                                |                |                                                                                                |                                                                                       |
| Hyperlipidemia   |                                                                                |                |                                                                                                |                                                                                       |
| Fatty liver      |                                                                                |                |                                                                                                |                                                                                       |
| Liver cirrhosis  |                                                                                |                |                                                                                                |                                                                                       |
| Viral hepatitis  |                                                                                |                |                                                                                                |                                                                                       |
| Coronary disease |                                                                                |                |                                                                                                |                                                                                       |
| Cholecystitis    |                                                                                |                |                                                                                                |                                                                                       |
| Stroke           |                                                                                |                |                                                                                                |                                                                                       |
| Cancer           |                                                                                |                |                                                                                                |                                                                                       |
| Mental illness   |                                                                                |                |                                                                                                |                                                                                       |
