# Supplementary material for: A combined association of serum uric acid, alanine aminotransferase and waist circumference with non-alcoholic fatty liver disease: a community-based study
Source: PeerJ. 2022 Mar 4;10:e13022. doi: 10.7717/peerj.13022 (PMC8900609; doi:10.7717/peerj.13022)
Supplement: Supplemental Information 1 [file peerj-10-13022-s001.pdf]

识别编码：|\_|\_|\_|\_|\_|\_|\_|\_|\_|\_|\_|\_|\_|\_|\_|\_|

# 健康调查问卷

您好！

您好！这是一份健康调查问卷，目的是通过调查了解您的健康状况，请您根据自身实际状况填写答案。本调查所得数据用于您的健康体检数据分析，您的个人信息我们将做好保密工作。恳请您能协助完成本次调查。感谢您的支持与配合！

圈选出最符合的选项或根据问题在横线上填写答案。

## 一、基本信息

A1. 您的性别： 1...男      2...女

A2. 您的出生日期:            年    月    日

A3. 您的民族:

1...汉族      2...非汉族（请在横线上注明：\_\_\_\_\_）

A4. 您本人的最高文化程度是什么?

1...小学    2...初中    3...高中（中专/技校）    4...大专    5...本科

6...硕士 7...博士及以上

A5. 您目前的婚姻状况是:

1...未婚      2...已婚      3...离异      4...丧偶

## 二、吸烟、饮酒情况

S1. 您过去经常吸烟（指每天吸烟 1 支以上，连续 6 个月及以上）吗？

0...否      1...是

S2. 如果是，大多数情况下您每天吸烟 支。

AL1. 您过去经常饮酒（指每周饮酒 3 次以上，连续 6 个月及以上）吗？

0...否      1...是

AL2. 如果是，大多数情况下您平均每天饮酒 毫升。

AL3. 大多数情况下您的饮酒种类为?

1...白酒      2...啤酒      3...红酒      4...葡萄酒      5...洋酒

6...其他（请在横线上注明：\_\_\_\_\_）

三、个人疾病史及家族史

请您根据实际情况将相应选项的数字编号填写到对应的格子里。

| 病种    | 您是否曾被医生诊断过相关疾病？<br>0…否 1…是 9…不记得 | 确诊年份 | 您的直系亲属是否曾被医生诊断过相关疾病？<br>0…否 1…是 9…不清楚 | 与您的关系<br>1…父亲 2…母亲 3…兄弟姐妹 4…子女 |
|-------|----------------------------------|------|---------------------------------------|--------------------------------|
| 高血压病  |                                  |      |                                       |                                |
| 糖尿病   |                                  |      |                                       |                                |
| 高脂血症  |                                  |      |                                       |                                |
| 脂肪肝   |                                  |      |                                       |                                |
| 肝硬化   |                                  |      |                                       |                                |
| 病毒性肝炎 |                                  |      |                                       |                                |
| 冠心病   |                                  |      |                                       |                                |
| 胆囊炎   |                                  |      |                                       |                                |
| 脑卒中   |                                  |      |                                       |                                |
| 恶性肿瘤  |                                  |      |                                       |                                |
| 精神疾病  |                                  |      |                                       |                                |
